# Supplementary material for: Glycosaminoglycans and Contrast Agents: The Role of Hyaluronic Acid as MRI Contrast Enhancer
Source: MDPI journal article supplement (doi:10.3390/biom10121612), 2020-11-28
Supplement: s1 [file s1]

# Glycosaminoglycans and Contrast Agents: The Role of Hyaluronic Acid as MRI Contrast Enhancer

Alfonso Maria Ponsiglione <sup>1,2</sup>, Maria Russo <sup>2,†</sup>, and Enza Torino <sup>2,3 \*</sup>

<sup>1</sup> Department of Electrical Engineering and Information Technology (DIETI), University of Naples “Federico II”, Via Claudio 21, 80125, Naples, Italy; alfonso maria.ponsiglione@unina.it

<sup>2</sup> Department of Chemical, Materials and Production Engineering, University of Naples Federico II, Piazzale V. Tecchio 80, 80125 Naples, Italy; maria.russo@espci.psl.eu

<sup>3</sup> Interdisciplinary Research Center on Biomaterials, CRIB, Piazzale V. Tecchio 80, 80125 Naples, Italy;

\* Correspondence: enza.torino@unina.it; Tel.: +39-328-955-8158

† Present address: Microfluidique, MEMS et Nanostructures, Institut Pierre-Gilles de Gennes, CNRS UMR 8231, ESPCI Paris and Paris Sciences et Lettres (PSL) Research University, Paris 75005, France;

**Table S1.** Values of water self-diffusion coefficient at different DVS concentrations measured at 20 MHz after 8h and 24h from DVS addition.

| HA<br>(% w/v) | DVS/HA<br>(g/g) | D (10 <sup>-9</sup> m <sup>2</sup> /s) <sup>1</sup><br>mean ± std | D (10 <sup>-9</sup> m <sup>2</sup> /s) <sup>2</sup><br>mean ± std |
|---------------|-----------------|-------------------------------------------------------------------|-------------------------------------------------------------------|
| 0.25          | 0               | 3.05 ± 0.01                                                       | 3.06 ± 0.01                                                       |
| 0.25          | 2.35            | 3.01 ± 0.01                                                       | 3.02 ± 0.01                                                       |
| 0.25          | 4.70            | 2.97 ± 0.02                                                       | 2.98 ± 0.01                                                       |
| 0.25          | 7.06            | 2.95 ± 0.02                                                       | 2.96 ± 0.01                                                       |
| 0.25          | 9.42            | 2.93 ± 0.01                                                       | 2.94 ± 0.01                                                       |
| 0.25          | 11.77           | 2.91 ± 0.01                                                       | 2.92 ± 0.01                                                       |

<sup>1</sup> after 8h from the addition of DVS. <sup>2</sup> after 24h from the addition of DVS.

**Table S2.** Longitudinal relaxation times of the crosslinked and non-crosslinked samples without Gd-DTPA measured with Saturation and Inversion Recovery sequences.

| HA<br>(% w/v) | HA<br>(mM) | DVS/HA<br>(g/g) | T1 (ms) <sup>1</sup><br>mean ± std | T1 (ms) <sup>2</sup><br>mean ± std |
|---------------|------------|-----------------|------------------------------------|------------------------------------|
| 0             | 0          | 0               | 3650 ± 10                          | 3770 ± 40                          |
| 0.3           | 0.071      | 0               | 3730 ± 10                          | 3790 ± 20                          |
| 0.3           | 0.071      | 8               | 3500 ± 10                          | 2926 ± 7                           |
| 0.5           | 0.12       | 0               | 3630 ± 10                          | 3660 ± 10                          |
| 0.5           | 0.12       | 8               | 3000 ± 10                          | 3018 ± 7                           |
| 0.7           | 0.17       | 0               | 3640 ± 10                          | 3770 ± 40                          |
| 0.7           | 0.17       | 8               | 3290 ± 20                          | 3321 ± 7                           |

<sup>1</sup> measured using a Saturation Recovery (SR) sequence. <sup>2</sup> measured using an Inversion Recovery (IR) sequence.

**Table S3.** Relaxivity of the crosslinked and non-crosslinked samples without Gd-DTPA measured with Saturation and Inversion Recovery sequences.

| Sample          | DVS/HA<br>(g/g) | $r_1$ (mM <sup>-1</sup> s <sup>-1</sup> ) <sup>2</sup><br>mean $\pm$ std | $r_1$ (mM <sup>-1</sup> s <sup>-1</sup> ) <sup>2</sup><br>mean $\pm$ std |
|-----------------|-----------------|--------------------------------------------------------------------------|--------------------------------------------------------------------------|
| non-crosslinked | 0               | 0.014 $\pm$ 0.032                                                        | 0.017 $\pm$ 0.041                                                        |
| crosslinked     | 8               | 0.26 $\pm$ 0.18                                                          | 0.22 $\pm$ 0.30                                                          |

<sup>1</sup> measured using a Saturation Recovery (SR) sequence. <sup>2</sup> measured using an Inversion Recovery (IR) sequence.

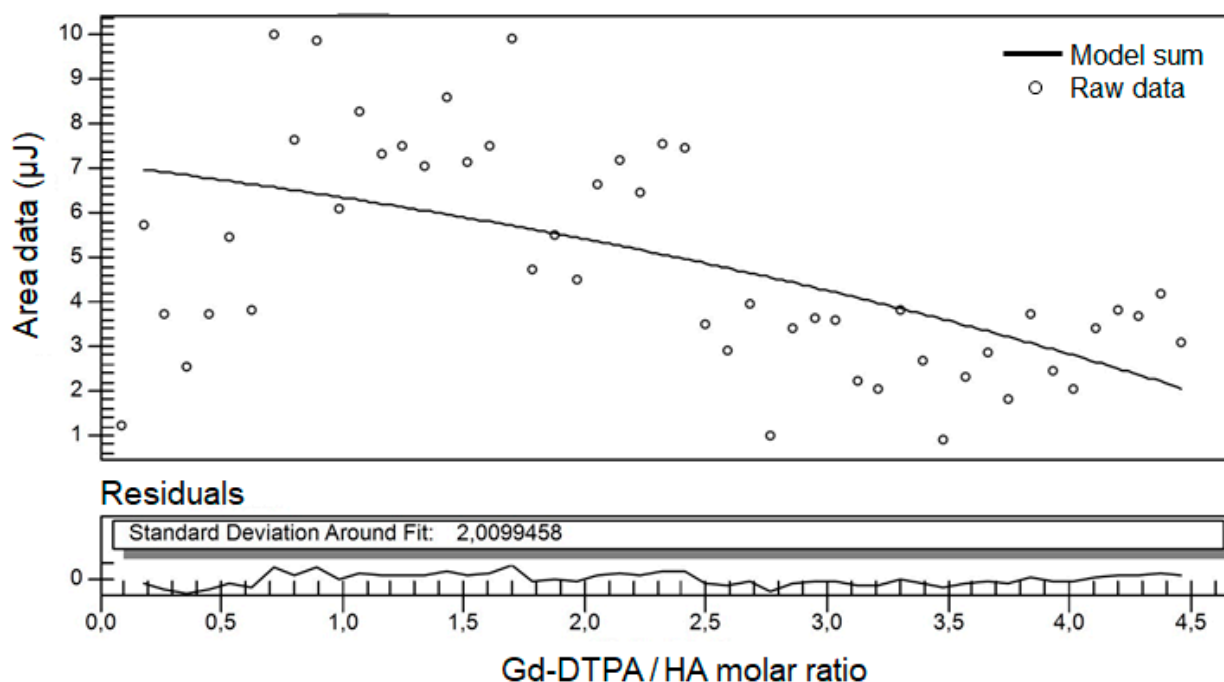

**Figure S1.** Fitting of ITC data for Gd-DTPA titrated into 0.1%w/v HA. ITC peak area data (empty circles) are plotted as a function of the Gd-DTPA / HA molar ratio. The model curve (solid line) is calculated as the sum of two models: independent sites model plus a constant used for the blank (i.e. Gd-DTPA in water). Residuals of the model and the standard deviation around fit are displayed in the bottom graph.
